# Supplementary material for: Versatile double hydrophilic block copolymer: dual role as synthetic nanoreactor and ionic and electronic conduction layer for ruthenium oxide nanoparticle supercapacitors
Source: Royal Society of Chemistry journal article supplement (doi:10.1039/c2jm30738c), 2012-01-01
Supplement: c2jm30738c.pdf [file c2jm30738c.pdf]

# **Versatile Double Hydrophilic Block Copolymers: Dual Role as Synthetic Nanoreactor and Ionic and Electronic Conducting Layer for Ruthenium Oxide Nanoparticle Supercapacitors**

*Eunyong Seo, Taemin Lee, Kyu Tae Lee, Hyun-Kon Song and Byeong-Su Kim\**

Interdisciplinary School of Green Energy,

KIER-UNIST Advanced Center for Energy and Low Dimensional Carbon Materials Center,

Ulsan National Institute of Science and Technology (UNIST), Ulsan 689-798, Korea

E-mail: bskim19@unist.ac.kr

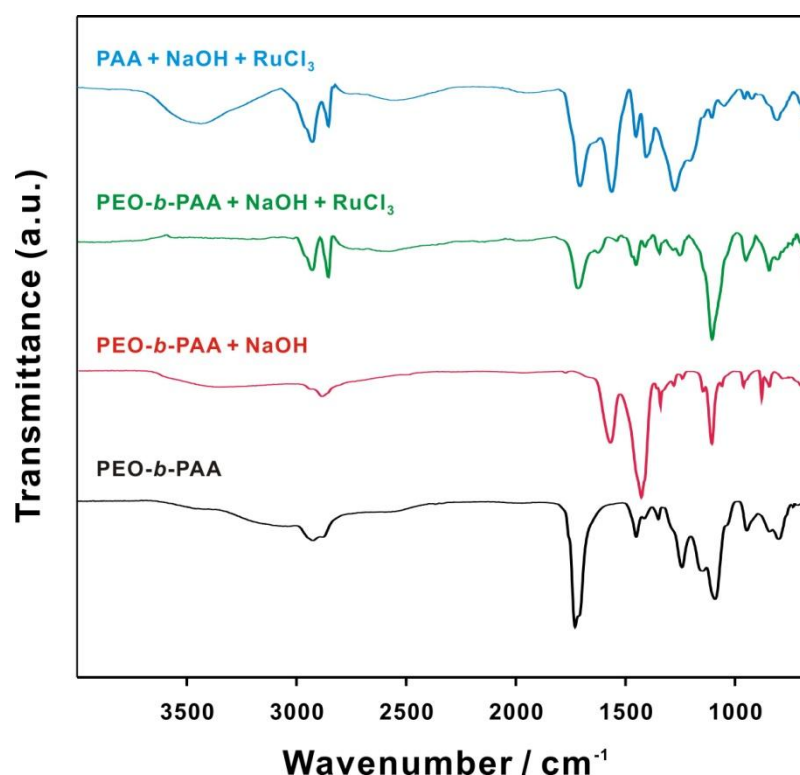

**Figure S1.** FT-IR spectra of (a) PEO-*b*-PAA, (b) PEO-*b*-PAA with NaOH, (c) PEO-*b*-PAA with NaOH and RuCl<sub>3</sub>·*x*H<sub>2</sub>O, and (d) PAA with NaOH and RuCl<sub>3</sub>·*x*H<sub>2</sub>O. Note that the PEO-*b*-PAA shows the C=O stretching vibration of the carboxylic group at 1729 cm<sup>-1</sup> and the C-O stretching vibration of PEO block and PAA block at 1241 and 1091 cm<sup>-1</sup>, respectively. Upon complexation with Ru<sup>3+</sup> through electrostatic interaction to form micellar structure, the carboxylic acid groups of PAA block are dissociated into COO<sup>-</sup> groups, which correspond to the absorption peaks at 1625 and 1410 cm<sup>-1</sup> assigned to asymmetric and symmetric stretching vibrations of COO<sup>-</sup>, while a peak of C-O observed in PEO block still remains at 1104 cm<sup>-1</sup>. This implies that the carboxylate groups of PAA block are easily involved in the reaction by combining with Ru<sup>3+</sup>. In a control experiment using only PAA polymer, the absorption peaks at 1561 and 1404 cm<sup>-1</sup> could be assigned to asymmetric and symmetric stretching vibrations of COO<sup>-</sup>, supporting carboxylate groups in PAA complex with Ru<sup>3+</sup>.

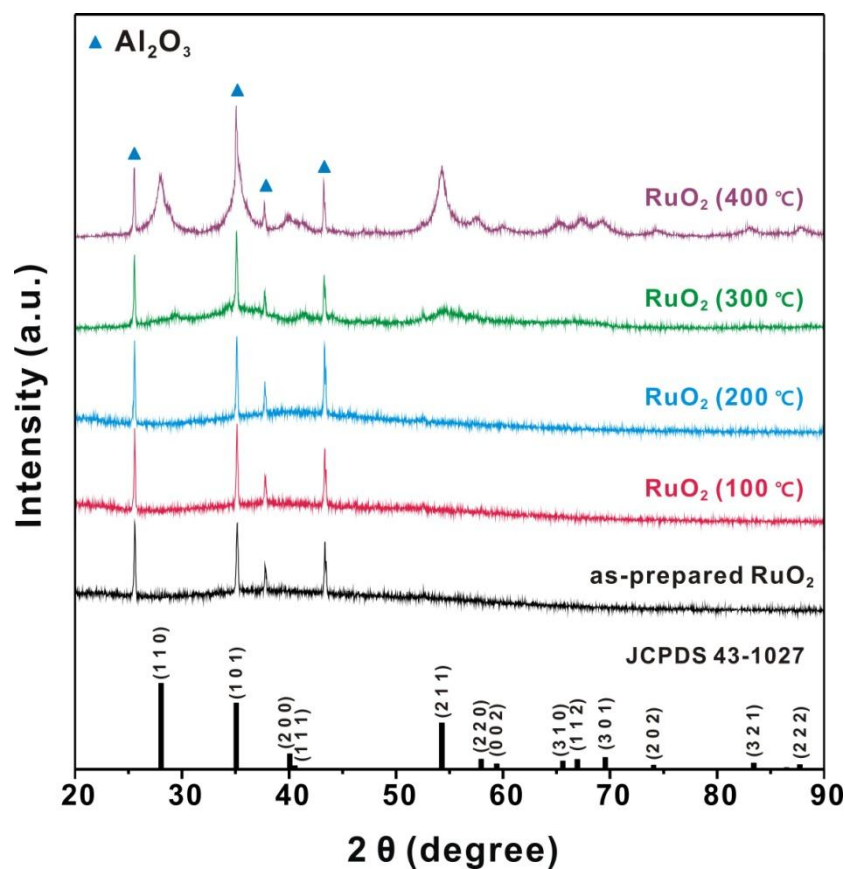

**Figure S2.** *In situ* XRD patterns of hydrous RuO<sub>2</sub>·xH<sub>2</sub>O nanoparticles with increasing temperature under ambient condition. It indicates that the crystalline RuO<sub>2</sub> structure is evolved from amorphous structure of as-prepared hydrous RuO<sub>2</sub>·xH<sub>2</sub>O near at 300 °C. Note that the peaks marked with blue triangle are assigned to the Al<sub>2</sub>O<sub>3</sub> substrate, where the sample was loaded.

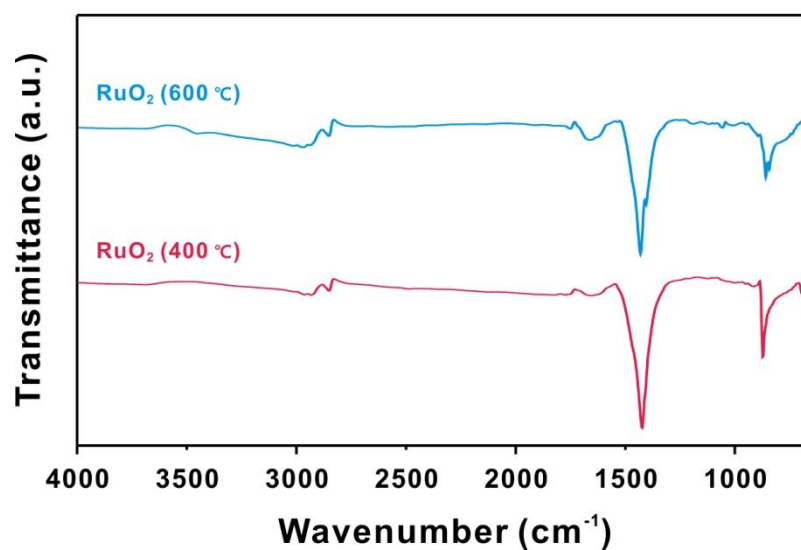

**Figure S3.** FT-IR spectra of RuO<sub>2</sub> nanoparticles annealed at 400 °C and 600 °C. Both spectra reveals the presence of residual polymeric layer, including symmetric stretching of carboxylate peaks at 1435 cm<sup>-1</sup>, which corresponds to the surface-bound strong coordinating carboxylate groups, and the other strong peak observed at 863 cm<sup>-1</sup> due to the strong rocking of methylene (-CH<sub>2</sub>-) backbone of the polymer.

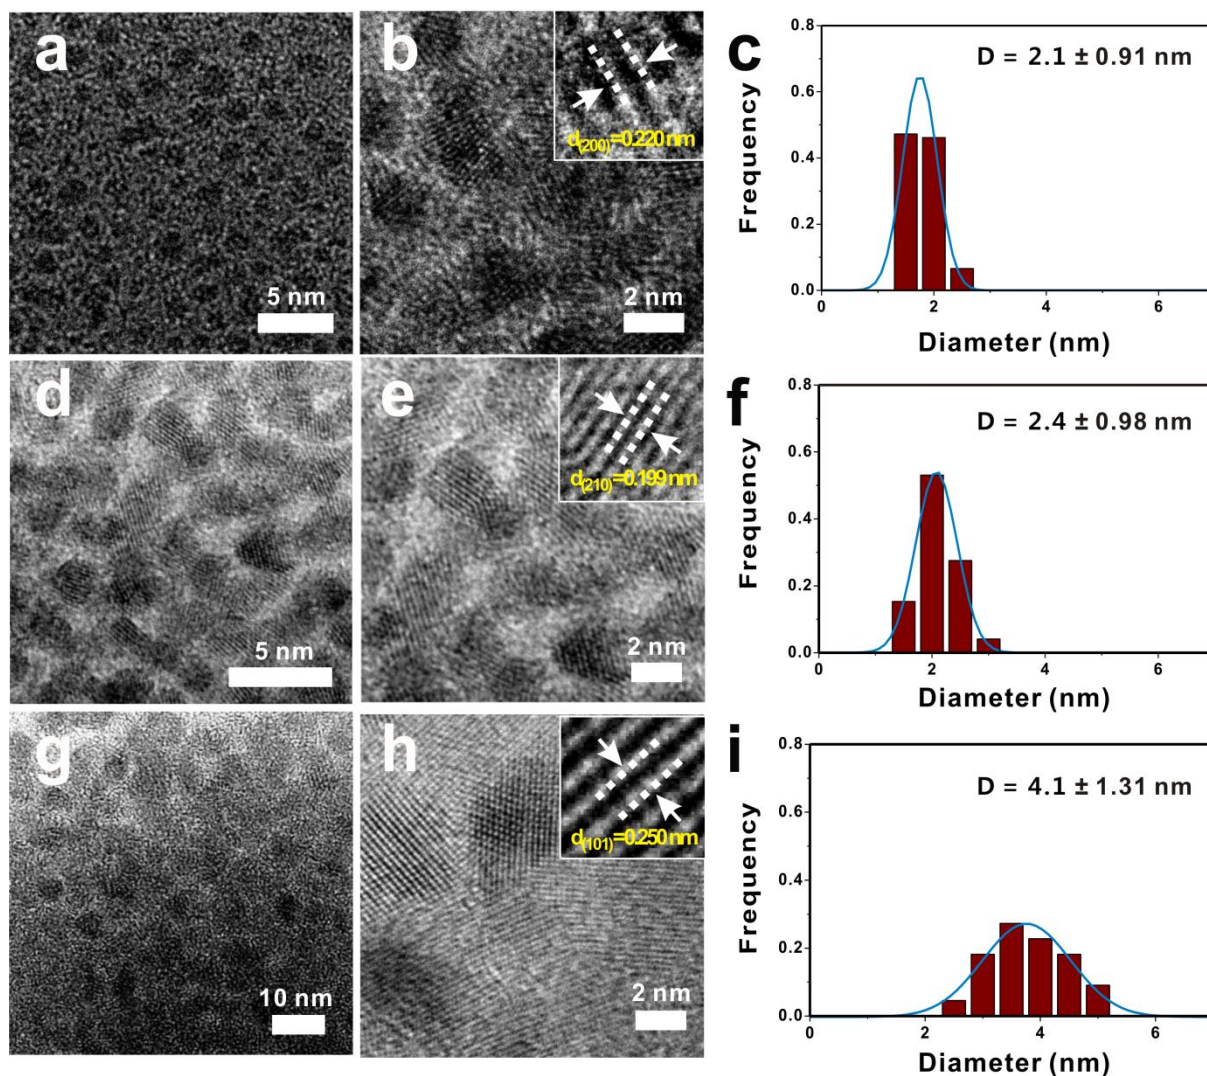

**Figure S4.** Representative TEM images of RuO<sub>2</sub> nanoparticles annealed at various temperatures. (a, b) 200 °C, (d, e) 400 °C and (g, h) 600 °C. The inset images show the crystalline plane of RuO<sub>2</sub> nanoparticles. (c, f, i) The corresponding size distribution histograms of RuO<sub>2</sub> nanoparticles averaged over 50 samples.

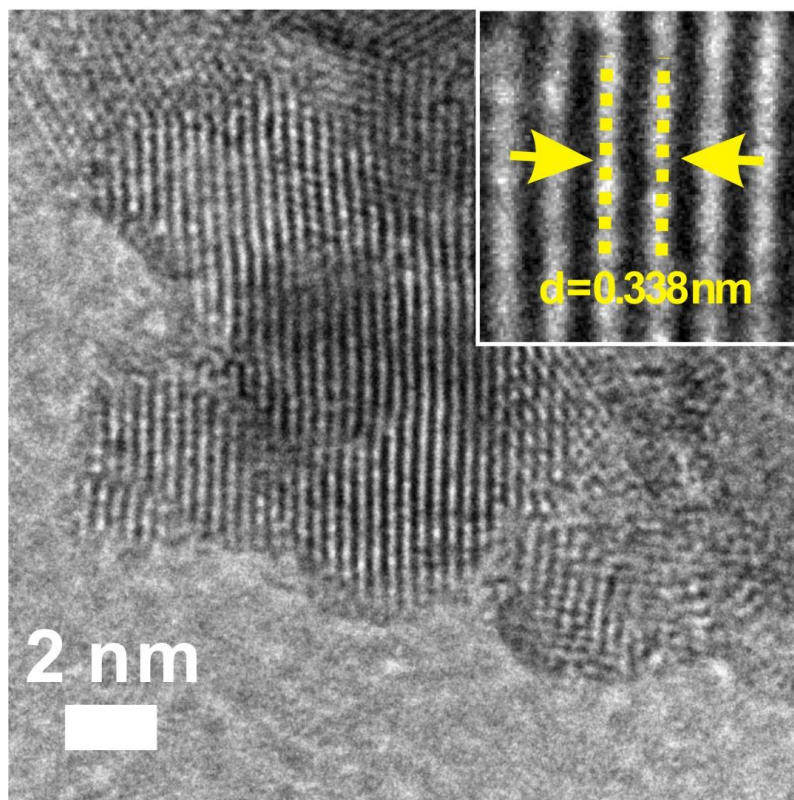

**Figure S5.** Representative HR-TEM image of RuO<sub>2</sub> nanoparticles annealed at 600 °C. Highly crystalline carbon layer is formed on the surface of RuO<sub>2</sub> nanoparticles.

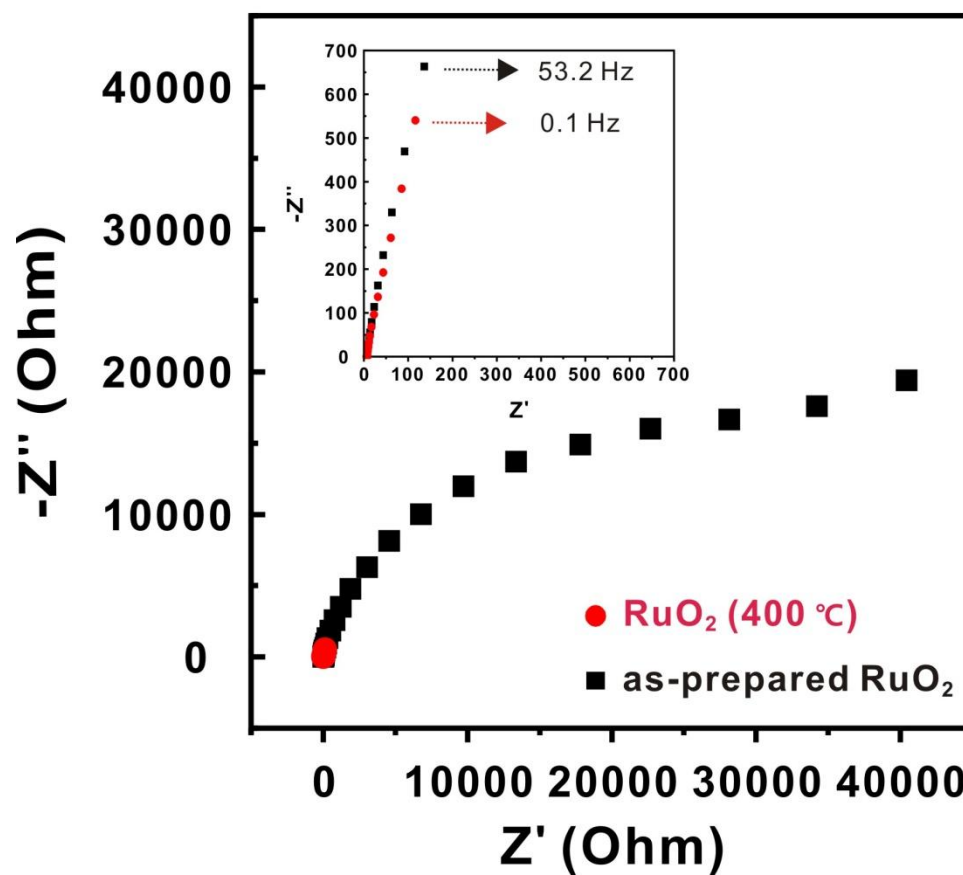

**Figure S6.** Nyquist plots for an electrode of (black square) as-prepared  $\text{RuO}_2$  and (red circle)  $\text{RuO}_2$  annealed at 400 °C, measured over a frequency range from 100 mHz to 200 kHz at 0.6 V.



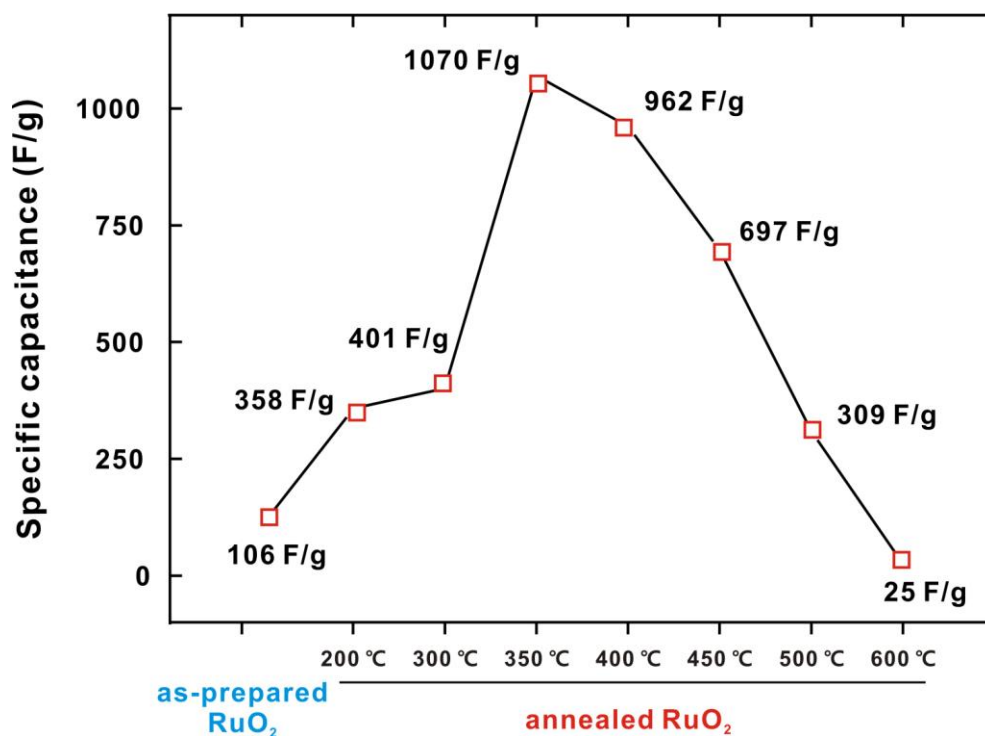

**Figure S7.** Comparison of capacitance values of all RuO<sub>2</sub> nanoparticles samples annealed at different temperature ranges. Capacitance values were obtained with a cyclic voltammetry measurement at a scan rate of 10 mV/s.



**Table 1.** Comparison of capacitance values of all RuO<sub>2</sub> nanoparticles samples annealed at different temperature ranges measured at various scan rates.

| Scan rate<br>(mV/s) | as-prepared<br>hydrous RuO <sub>2</sub> | annealed RuO <sub>2</sub> nanoparticles |        |        |        |        |        |        |
|---------------------|-----------------------------------------|-----------------------------------------|--------|--------|--------|--------|--------|--------|
|                     |                                         | 200 °C                                  | 300 °C | 350 °C | 400 °C | 450 °C | 500 °C | 600 °C |
| 10                  | 106                                     | 358                                     | 401    | 1070   | 962    | 697    | 309    | 25     |
| 20                  | 59                                      | 306                                     | 314    | 953    | 637    | 464    | 293    | 35     |
| 50                  | 29                                      | 254                                     | 260    | 858    | 553    | 426    | 284    | 32     |
| 100                 | 17                                      | 223                                     | 231    | 819    | 472    | 396    | 276    | 30     |
| 200                 | 11                                      | 166                                     | 209    | 751    | 430    | 362    | 266    | 28     |
